# Supplementary material for: Theoretical prediction of MoN2 monolayer as a high capacity electrode material for metal ion batteries
Source: Royal Society of Chemistry journal article supplement (doi:10.1039/c6ta07065e), 2016-01-01
Supplement: c6ta07065e1.pdf [file c6ta07065e1.pdf]

## Theoretical prediction of MoN<sub>2</sub> monolayer as a high capacity electrode material for metal ion batteries

Xiaoming Zhang,<sup>a</sup> Zhiming Yu,<sup>a,b</sup> Shan-Shan Wang,<sup>a</sup> Shan Guan,<sup>a,b</sup> Hui Ying Yang,<sup>\*,a</sup> Yugui Yao,<sup>\*,b</sup> and Shengyuan A. Yang<sup>\*,a</sup>

<sup>a</sup>Research Laboratory for Quantum Materials and Engineering Product Development Pillar, Singapore University of Technology and Design, Singapore 487372, Singapore. E-mail: yanghuiying@sutd.edu.sg; shengyuan\_yang@sutd.edu.sg

<sup>b</sup>School of Physics, Beijing Institute of Technology, Beijing 100081, China. E-mail: ygyao@bit.edu.cn

**Table SI** Electrochemical characteristics of current widely investigated cathode materials. And corresponding reference in article.

<sup>a</sup> Values without and within brackets are given for the theoretical and practical specific capacity of corresponding cathodes, respectively.

|                                                                        | Specific capacity <sup>a</sup><br>(mA h g <sup>-1</sup> ) | Average potential<br>(V vs. Li/Li <sup>+</sup> ) | Reference             |
|------------------------------------------------------------------------|-----------------------------------------------------------|--------------------------------------------------|-----------------------|
| MoN <sub>2</sub> monolayer                                             | 432                                                       | 3.64                                             | Current work          |
| LiCoO <sub>2</sub>                                                     | 272 (140)                                                 | ~4.2                                             | <a href="#">54,55</a> |
| LiNi <sub>1/3</sub> Mn <sub>1/3</sub> Co <sub>1/3</sub> O <sub>2</sub> | 272 (200)                                                 | ~3.7                                             | <a href="#">56</a>    |
| LiMn <sub>2</sub> O <sub>4</sub>                                       | 148 (120)                                                 | ~4.1                                             | <a href="#">57</a>    |
| LiFePO <sub>4</sub>                                                    | 170 (160)                                                 | 3.45                                             | <a href="#">58,59</a> |
| S                                                                      | 1675 (500-1100)                                           | 2.15                                             | <a href="#">60,61</a> |
